# Supplementary material for: Insights into the abnormal increase of ozone during COVID-19 in a typical urban city of China
Source: Copernicus journal article supplement (doi:10.5194/acp-2021-834), 2021-10-06
Supplement: Supplementary file 1 [file acp-2021-834-supplement.pdf]

*Supplement of*

**Insights into the abnormal increase of ozone during COVID-19  
in a typical urban city of China**

**Kun Zhang et al.**

*Correspondence to:* Li Li (lily@shu.edu.cn)

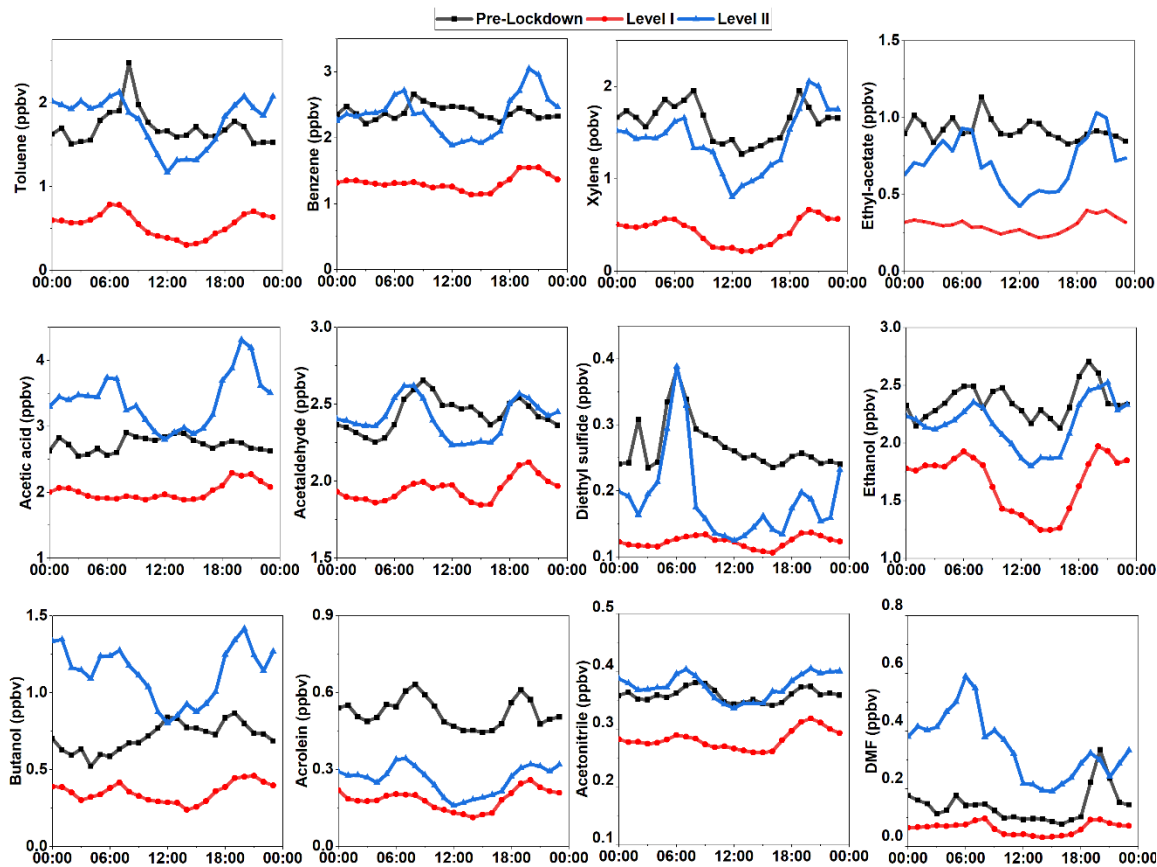

Figure S1. Average diurnal variations of key VOC species.

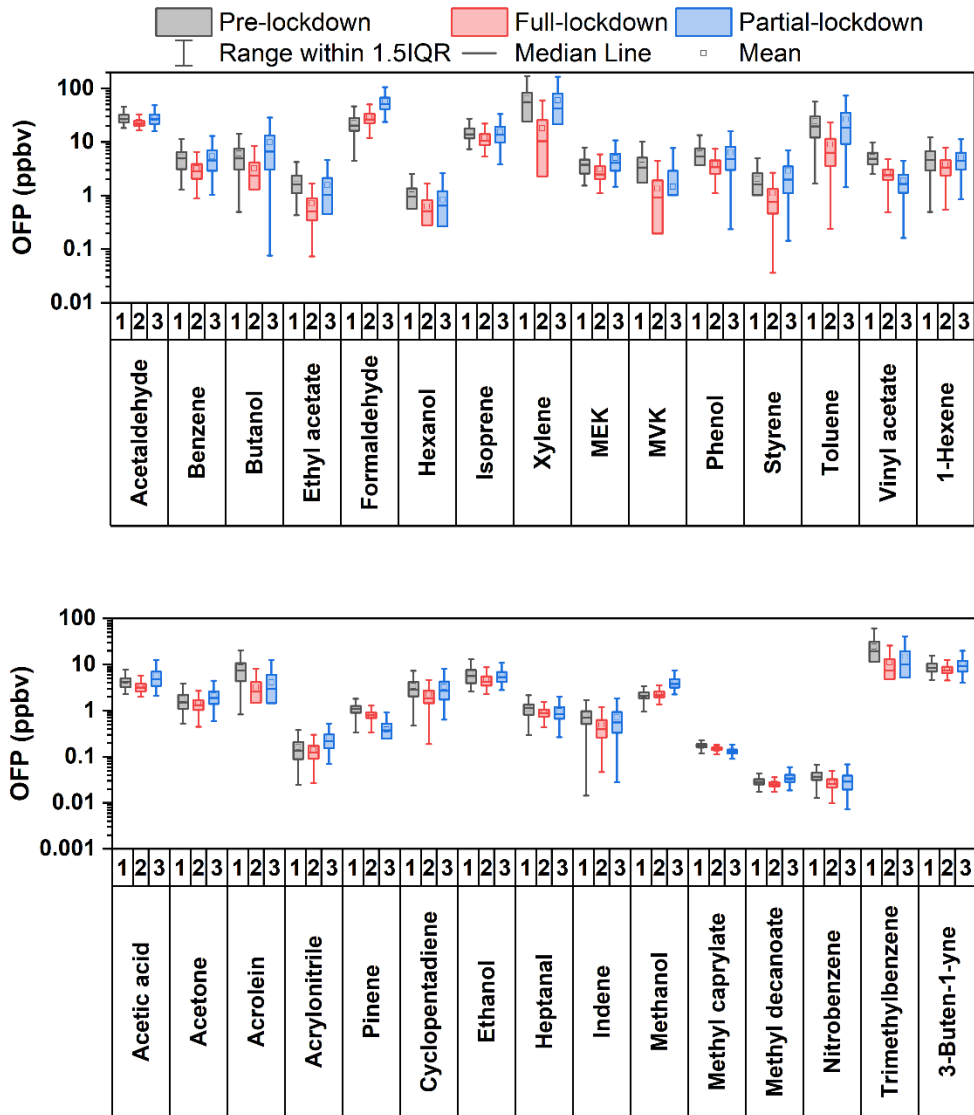

Figure S2. OFP of different VOCs species.

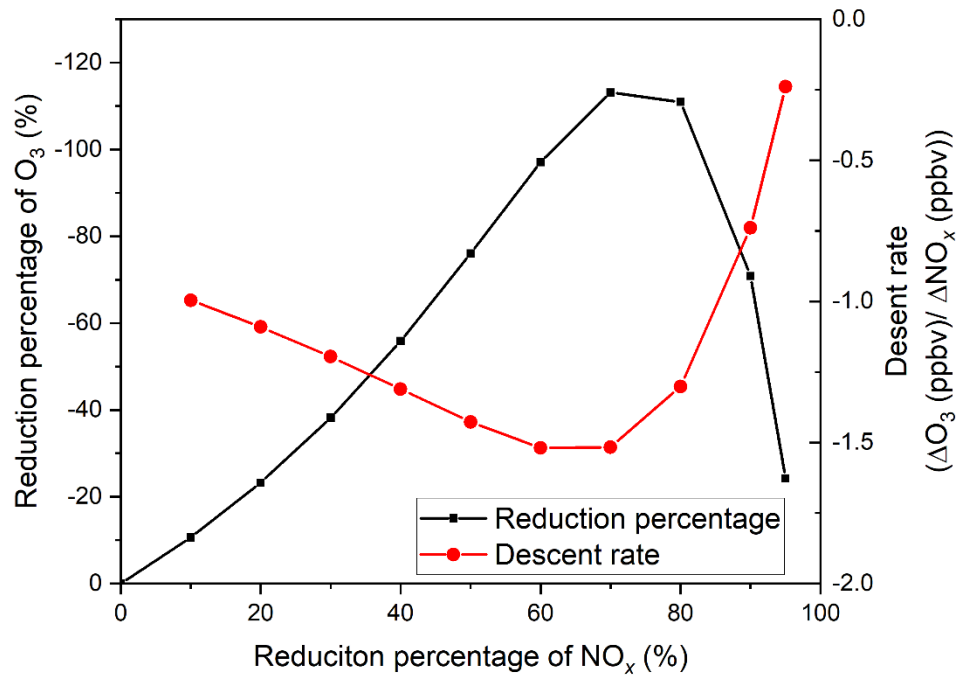

Figure S3. Reduction percentage and descent speed of O<sub>3</sub> as a function of reduction percentage of NO<sub>x</sub>.
